# Supplementary material
Source: publisher figshare collection journal article supplement (https://tandf.figshare.com/ndownloader/files/19281896)
Supplement: Supplementary file 1 [file 19281896]

As we had purified Mrc1(287-1096AA)-removed GST, we compared these two Mrc1(287-1096AA) as shown below:

Fig.S1. 2D average of Mrc1 (287-1096AA) with and without GST-tag. Left: The micrograph and 2D average of Mrc1 (287-1096AA) removed GST-tag; Right: The micrograph and 2D average of Mrc1 (287-1096AA) with GST-tag.

The particles in each micrograph are similar in size，and preliminary 2D average shows that both of them are 70-80Å in diameter.
